# Supplementary material
Source: PubMed Central journal article supplement (PMC3811599)
Supplement: JB.00767-13_zjb999092882so1.pdf [file JB.00767-13_zjb999092882so1.pdf]

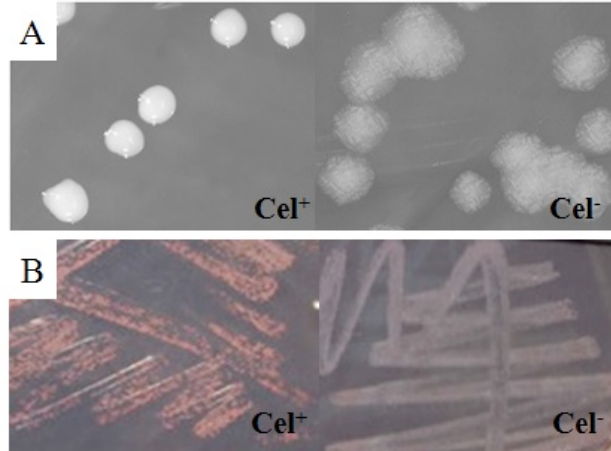

**FIG S1** Colonies of stable cellulose-producing ( $Cel^+$ ) and stable non-cellulose-producing ( $Cel^-$ ) clones derived from a cellulose over-producing strain of *G. hansenii* ATCC23769. A: Colonies on SH agar plates. B: Colonies on SH agar plates containing 0.001% Pontamine Fast Scarlet 4B.

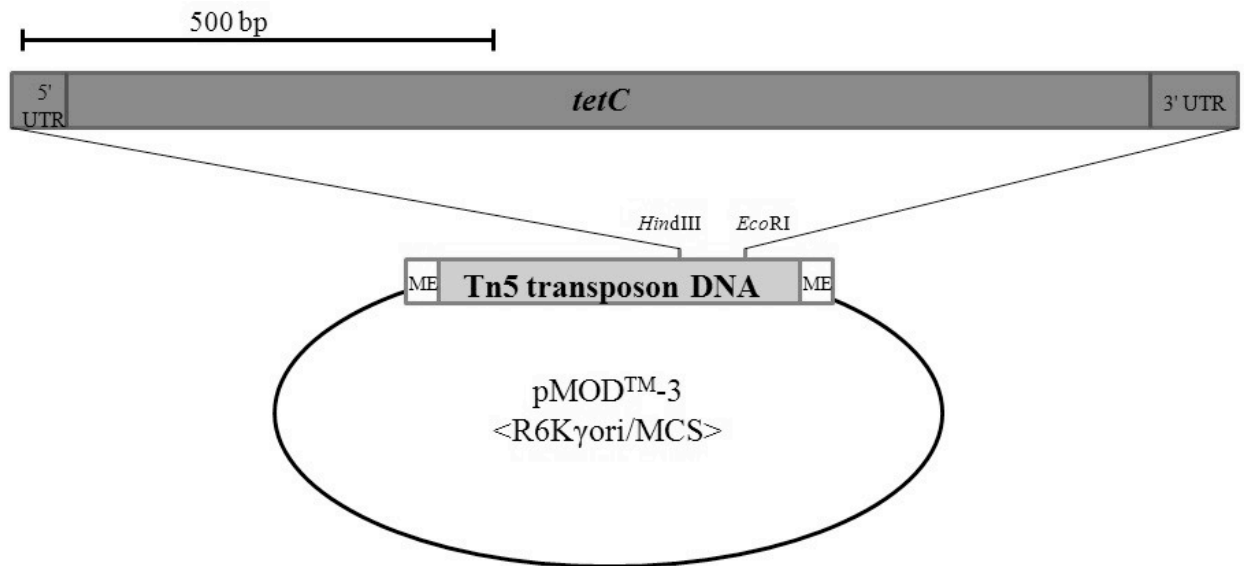

**FIG S2** Schematic of the Tn5 transposon DNA used in insertion mutagenesis of *G. hansenii* ATCC23769. The tetracycline resistance gene (*tetC*) was amplified from pUCD2 by PCR and inserted at the *Hind*III and *Eco*RI sites of EZ-Tn5 pMOD<sup>™</sup>-3 <R6K $\gamma$ ori/MCS>. The resulting plasmid was amplified by PCR to generate Tn5 transposon DNA for mutagenesis. “ME” denotes the recognition sequence of EZ-Tn5 transposase.

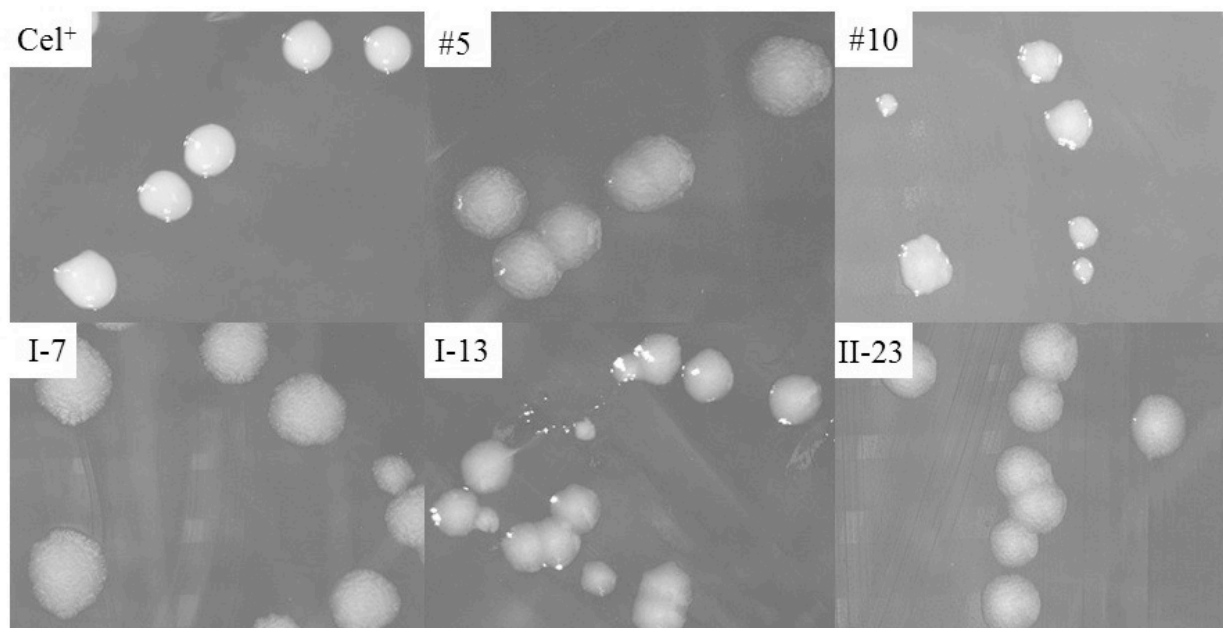

**FIG S3** Morphologies of wild type cellulose-producing clone ( $Cel^+$ ) and five non-cellulose-producing ( $Cel^-$ ) mutants. Each mutant shown has Tn5 transposon DNA inserted in a different gene, *acsA* in mutant #5; *acsC* in mutant #10; *dgcI* in mutant I-7; *ccp<sub>Ax</sub>* in mutant I-13; *crp-fnr* in mutant II-23 (see Table 2 for details). Cells were grown on SH agar plates containing tetracycline (20  $\mu\text{g/ml}$ ).

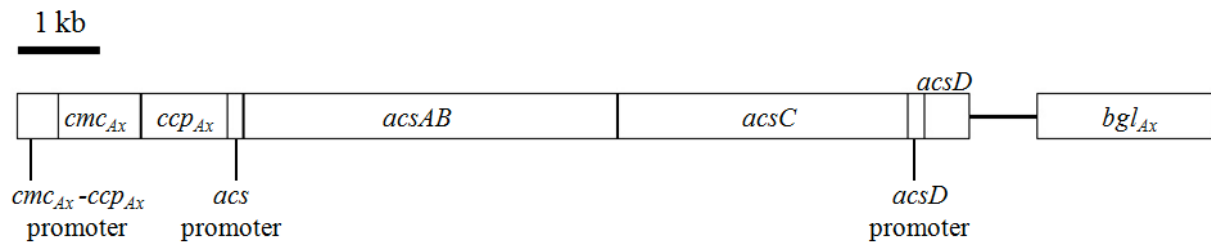

**FIG S4** Schematic of the locations of the promoters identified in this study. The promoter of the operon consisting of *cmc<sub>Ax</sub>* and *ccp<sub>Ax</sub>* is located in the 504-kb region upstream from the translation initiation codon of *cmc<sub>Ax</sub>*. The promoter of the *acs* operon, consisting of *acsAB* and *acsC*, is located in the 221-kb spacer between the translation termination codon of *ccp<sub>Ax</sub>* and translation initiation codon of *acsAB*. The promoter of *acsD* is located in the 321-kb spacer between the translation termination codon of *acsC* and translation initiation codon of *acsD*. *bgl<sub>Ax</sub>*, encoding  $\beta$ -glucosidase, is included because its function in cellulose synthesis was examined in this study. The distance between the translation stop codon of *acsD* and the translation initiation codon of *bgl<sub>Ax</sub>* is 830 bp.

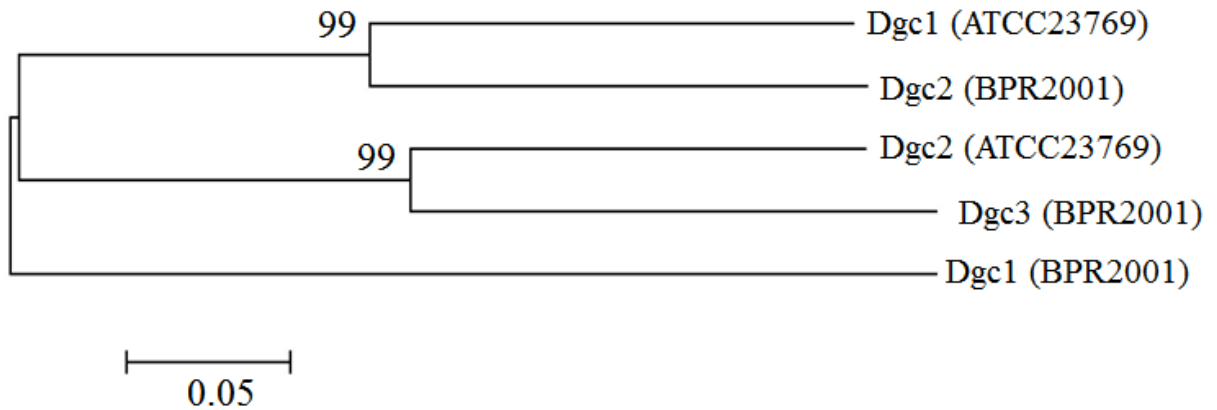

**FIG S5** A phylogenetic tree of the deduced amino acid sequences of diguanylate cyclase genes in *G. hansenii* ATCC23769 and *G. xylinus* BPR2001. The tree was constructed using MEGA4 (<http://www.megasoftware.net/index.html>). Numbers indicate the bootstrap values derived from 1,000 replications. The GenBank accession numbers are: GXY\_15447 and GXY\_01661 for *dgc1* and *dgc2* of *G. hansenii* ATCC23769, respectively; AF052517, AF052518 and AF052519 for *dgc1*, *dgc2* and *dgc3* of *G. xylinus* BPR2001, respectively. The bar represents 0.05 substitutions per amino acid position.

**TABLE S1** Bacterial strains and plasmids used in this study

| Strain or plasmid                           | Relevant genotype or characteristics                                                                                                                                                                  | Source/reference        |
|---------------------------------------------|-------------------------------------------------------------------------------------------------------------------------------------------------------------------------------------------------------|-------------------------|
| <b>Strain</b>                               |                                                                                                                                                                                                       |                         |
| <i>Gluconacetobacter hansenii</i> ATCC23769 | Wild type, cellulose-overproducing isolate                                                                                                                                                            | Candace Haigler (1982)  |
| <i>Escherichia coli</i> DH5 $\alpha$        | fhuA2 $\Delta$ (argF-lacZ)U169, phoA, glnV44 $\Phi$ 80 $\Delta$ , (lacZ)M15, gyrA96 recA1, relA1, endA1, thi-1 hsdR17                                                                                 | New England BioLabs     |
| Stellar <sup>TM</sup>                       | Used for standard DNA manipulations; F-, endA1, supE44, thi-1, recA1, relA1, gyrA96, phoA, $\Phi$ 80d lacZ $\Delta$ M15, $\Delta$ (laZYA -arF) U169, $\Delta$ (mrr -hsdRMS -mcrBC), mcrA, $\lambda$ - | Clontech                |
| <b>Plasmid</b>                              |                                                                                                                                                                                                       |                         |
| pMOD <sup>TM</sup> -3                       | EZ-Tn5 <sup>TM</sup> transposon construction vector, ampR, R6K $\gamma$ ori/MCS                                                                                                                       | Epicentre Biotechnology |
| pUCD2                                       | Shuttle vector, ampR, kanR, tetC, spcR,                                                                                                                                                               | ATCC 37342              |
| pGEM <sup>®</sup> -T                        | TA cloning vector, ampR, lacZ/MCS                                                                                                                                                                     | Promega                 |
| pUC18                                       | Integrated vector, ampR                                                                                                                                                                               | Clontech                |

**TABLE S2** Primers used in this study

| Primer              | Sequence (5'-3') <sup>a</sup>                                    | Note                                                             |
|---------------------|------------------------------------------------------------------|------------------------------------------------------------------|
| TetC F1             | agtc <u>aagctt</u> AGCTTTAATGCGGTAGT ( <i>Hind</i> III)          | amplification of <i>tetC</i> for cloning into pMOD-3             |
| TetC R1             | agtc <u>gaattc</u> GGTTGGTTTGCGCATTCACA ( <i>Eco</i> RI)         |                                                                  |
| ME plus 9-3' primer | CTGTCTCTTATACACATCTCAACCATCA                                     | For amplification of Tn5 transposon DNA                          |
| ME plus 9-5' primer | CTGTCTCTTATACACATCTCAACCCTGA                                     |                                                                  |
| TSP1                | GAACGGGTTGGCATGGATTGT                                            | for genomic DNA walking PCR                                      |
| TSP2                | GGCCACCTCGACCTGAATGGAA                                           |                                                                  |
| AcsA-PF             | aaggcatcggtcgacCCTATATTCAGGCGACCGCCTGT ( <i>Sal</i> I)           | for complementation of <i>acsAB</i> and <i>acsC</i> in mutant #5 |
| AcsC-CER            | ttcggtcctccgatcgATACACAGGATTGGTCGGGAAGA ( <i>Pvu</i> I)          |                                                                  |
| Dgc1-CEF            | aaggcatcggtcgacTGATGATAACGGGTCGTCGTACTIONGT ( <i>Sal</i> I)      | for complementation of <i>dgc1</i> in mutant I-7                 |
| Dgc1-CER            | ttcggtcctccgatcgGAACATGCATGATGCGTCGCGTA ( <i>Pvu</i> I)          |                                                                  |
| Crp-CEF             | aaggcatcggtcgacATATCAAGGGGTCAGACATAGTG T ( <i>Sal</i> I)         | for complementation <i>crp-fnr</i> in mutant II-23               |
| Crp-CER             | ttcggtcctccgatcgATCCTGGAATTTTCATGCAGGGAT ( <i>Pvu</i> I)         |                                                                  |
| AcsC-CEF            | ATGACCCATAAACGATATGCTTCGT                                        | for complementation of <i>acsC</i> in mutant #10                 |
| AcsC-CER            | ttcggtcctccgatcgATACACAGGATTGGTCGGGAAGA ( <i>Pvu</i> I) (repeat) |                                                                  |

---

|                        |                                                             |                                                                                                                                                            |
|------------------------|-------------------------------------------------------------|------------------------------------------------------------------------------------------------------------------------------------------------------------|
| AcsD-PF                | aaggcatcggtcgacTGGCCTGTTTGGACTGGGATGTCA<br>( <i>SalI</i> )  | for amplifying DNA<br>fragment containing<br><i>acsD</i> promoter                                                                                          |
| AcsD-PR                | attgtagatttcatTACTGGTCCATAATAAGATAGTGA                      |                                                                                                                                                            |
| AcsA-PF                | aaggcatcggtcgacCCTATATTCAGGCGACCGCCTGT<br>( <i>SalI</i> )   | for amplifying DNA<br>fragment containing<br>promoter of <i>acs</i><br>operon                                                                              |
| AcsA-PR                | attgtagatttcatAAACAACCTCGTCCGAAATGCTGT                      |                                                                                                                                                            |
| Cmc <sub>Ax</sub> -PF  | aaggcatcggtcgacTTGCGGTTTGGGAAGTGCATTG<br>A                  | for amplifying DNA<br>fragment containing<br>promoter of <i>cmc<sub>Ax</sub>-<br/>ccp<sub>Ax</sub></i> operon                                              |
| Cmc <sub>Ax</sub> -PR  | attgtagatttcatAAAGGAACGTCGCCCGACC                           |                                                                                                                                                            |
| TetC pro-F             | ATGAAATCTAACAATGCGCTCATCGT                                  | for amplifying the<br>coding sequence of<br><i>tetC</i>                                                                                                    |
| TetC pro-R             | ttcggtcctccgatcgGGTTGGTTTGCGCATTCACA ( <i>PvuI</i> )        |                                                                                                                                                            |
| Ccp <sub>Ax</sub> -CER | ttcggtcctccgatcgACCCAGGCCAAAGACGGAATAGA<br>( <i>PvuI</i> )  | for amplifying DNA<br>fragment containing<br>promoter of <i>cmc<sub>Ax</sub>-<br/>ccp<sub>Ax</sub></i> operon used in<br>complementation of<br>mutant I-13 |
| AcsA-PR2               | tcgtttatgggtcatAAACAACCTCGTCCGAAATGCTGT                     | for amplifying DNA<br>fragment containing<br>promoter of <i>acs</i><br>operon used in<br>complementation of<br>mutant #10                                  |
| Bgl <sub>Ax</sub> -F   | cgactctagaggatccCGGTATCCAGTCGCAACATGTGA<br>( <i>BamHI</i> ) | amplification of<br>flanking regions of<br><i>bgl<sub>Ax</sub></i> for making<br>knockout construct                                                        |
| Bgl <sub>Ax</sub> -R   | tgtcaaacatgagaaGGTTTCCACTGTTCTTCAGCAGCA                     |                                                                                                                                                            |

---



|                       |                                                                 |                                                                                    |
|-----------------------|-----------------------------------------------------------------|------------------------------------------------------------------------------------|
| TetC-HF               | TTCTCATGTTTGACAGCTTATCA                                         | amplification of <i>tetC</i> for making <i>bgl<sub>Ax</sub></i> knockout construct |
| TetC-HR               | ccatgattac <u>gaattc</u> GGTTGGTTTGCGCATT CACA ( <i>EcoRI</i> ) |                                                                                    |
| Bgl-CF                | CATGACGCTTCAGGACAAACTGT                                         | for PCR confirmation of <i>tetC</i> insertion in <i>bgl<sub>Ax</sub></i>           |
| TSP4                  | GGCATAACCAAGCCTATGCCTACA                                        |                                                                                    |
| Cmc <sub>Ax</sub> -qF | CCCGACAAGAACAATGCCACAGA                                         | for quantitative Real-Time PCR analysis of <i>cmc<sub>Ax</sub></i> transcript      |
| Cmc <sub>Ax</sub> -qR | CATCAGGTTTCAGCACATCGCCAT                                        |                                                                                    |
| Ccp <sub>Ax</sub> -qF | AGGATGACCAGCATGACCAAGACA                                        | for quantitative Real-Time PCR analysis of <i>ccp<sub>Ax</sub></i> transcript      |
| Ccp <sub>Ax</sub> -qR | GACCACCCAGCGTCATGAACA                                           |                                                                                    |
| Bgl <sub>Ax</sub> -qF | TATTGCAGGTGTCACGGCCAAC                                          | for quantitative Real-Time PCR analysis of <i>bgl<sub>Ax</sub></i> transcript      |
| Bgl <sub>Ax</sub> -qR | ATGGTCGAACCAGCGATAGCCA                                          |                                                                                    |
| Dgc1-qF               | GAAAGCGTGGAGGACATGCAGA                                          | for quantitative Real-Time PCR analysis of <i>dgc1</i> transcript                  |
| Dgc1-qR               | CTGCCCGTTCTTCACACCACT                                           |                                                                                    |
| Crp-fnr-TF qF         | TCTCGAAGAGGCATCCAACGAACT                                        | for quantitative Real-Time PCR analysis of <i>crp-fnr</i> transcript               |
| Crp-fnr-TF qR         | GCGCTGTTGAGTTCACCGTGA                                           |                                                                                    |
| 16S rRNA-qF           | GGTCAAACCAACTCCCATGGTGT                                         | for quantitative Real-Time PCR analysis of 16S rRNA                                |
| 16S rRNA-qR           | CCGTCTCAGTTCGGATTGCACTCT                                        |                                                                                    |

<sup>a</sup> Lower-case letters of a primer sequence indicate the sequence designed for overlap between the resulting PCR fragment and another PCR fragment, or a cloning vector, for in-fusion cloning; upper-case letters of a primer sequence indicate the sequence corresponding to the gene to be amplified; the underlined nucleotides in a primer sequence indicates the recognition sequence of the restriction enzyme shown in parentheses.

**TABLE S3** Promoter activity assayed by tetracycline resistance of transformants

| Plasmid construct                        | Promoter                                        | Transformed into <i>E. coli</i> <sup>1</sup> | Transformed into <i>G. hasseni</i> ATCC23769 <sup>1</sup> |
|------------------------------------------|-------------------------------------------------|----------------------------------------------|-----------------------------------------------------------|
| pUCD2 ( <i>tetCp:tetC</i> <sup>2</sup> ) | <i>tetC</i>                                     | +                                            | +                                                         |
| pUCD2( <i>tetC</i> )                     | none ( <i>tetC</i> promoter deleted)            | -                                            | -                                                         |
| pUCD2: <i>cmc<sub>Ax</sub>p:tetC</i>     | <i>cmc<sub>Ax</sub>-ccp<sub>Ax</sub></i> operon | +                                            | +                                                         |
| pUCD2: <i>acsp:tetC</i>                  | <i>acs</i> operon                               | -                                            | +                                                         |
| pUCD2: <i>acsDp:tetC</i>                 | <i>acsD</i>                                     | -                                            | +                                                         |

<sup>1</sup>Transformed cells streaked out on LB (for *E. coli*) or SH (for *G. hansenii*) agar plates containing tetracycline (20 µg/ml); “+” indicating cell growth and “-” indicating no cell growth

<sup>2</sup>*tetC* denotes the coding region of the *tetC* gene from pUCD2.
